# Supplementary material
Source: PubMed Central journal article supplement (PMC2790583)
Supplement: mmc1.pdf [file mmc1.pdf]

## Supplemental Data

*AJHG*, Volume 85

# Genetic Structure of the Han Chinese Population

## Revealed by Genome-wide SNP Variation

Jieming Chen, Houfeng Zheng, Jin-Xin Bei, Liangdan Sun, Wei-hua Jia, Tao Li, Furen Zhang, Mark Seielstad, Yi-Xin Zeng, Xuejun Zhang, and Jianjun Liu

### Figure S1. Relationship between the Chinese and the HAPMAP Populations by PCA

(A) This is a two-dimensional plot based on the principal components (PC) 1 and 2, both of which account for the greatest variations between the populations. The East Asians were clustered together. (B) PC3 accounts for 0.316% of the total variation but failed to separate Japanese from the Chinese. (C) PC4 (0.156%) accounts for the small variation between the Chinese and JPT. All four populations can be seen distinctly here. CHB is situated nicely within the Chinese cluster in each plot below.

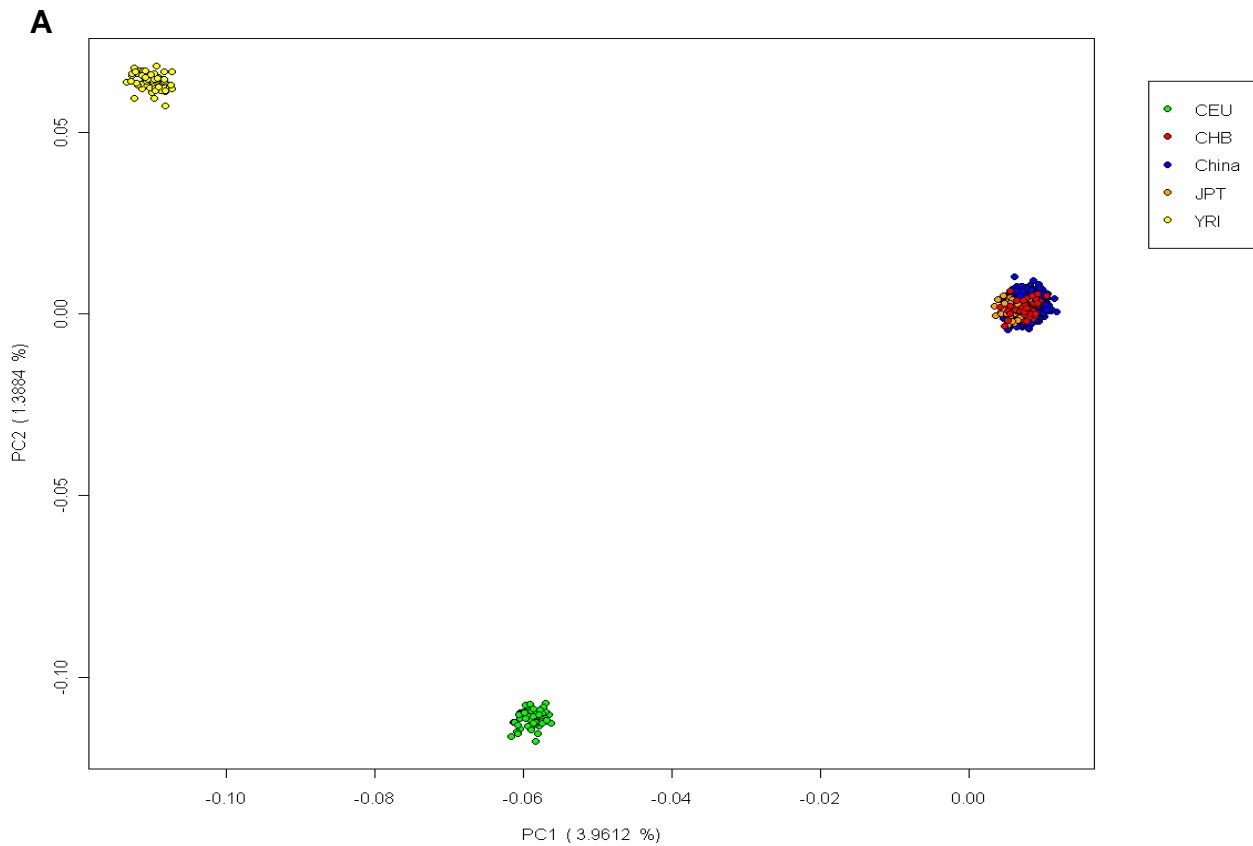

**B**

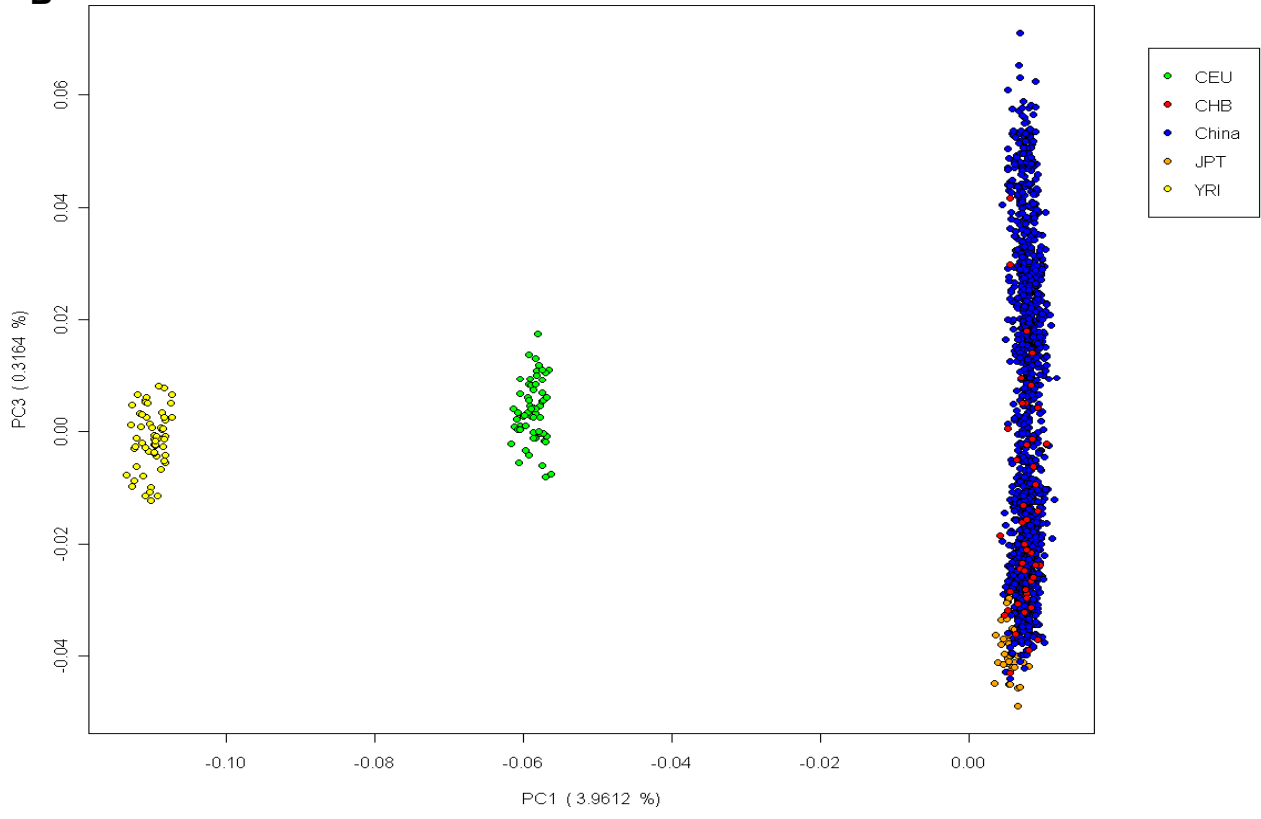

**C**

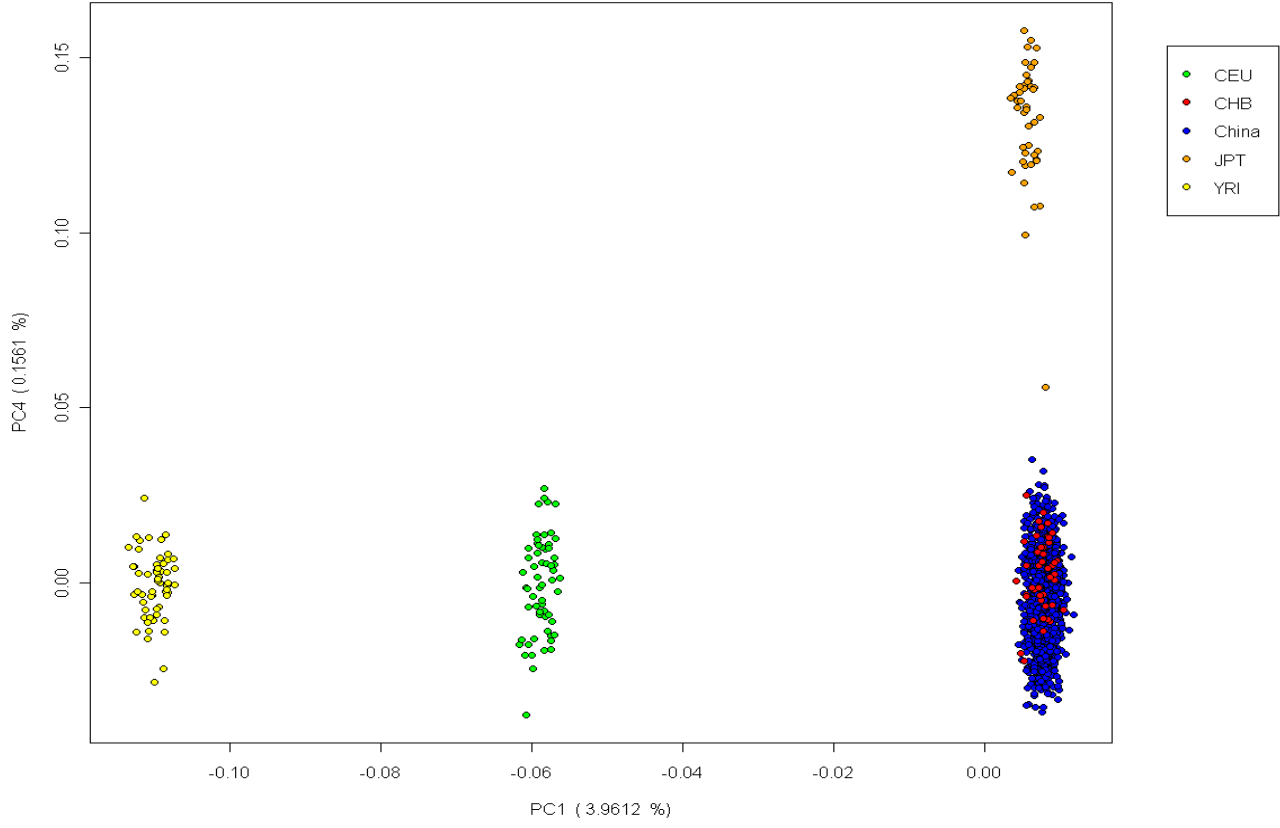

## Figure S2. Relationship between the East Asians by PCA

PC2 differentiated 44 JPT (orange) from HAPMAP from the Chinese cluster. However, we can see a relationship with the samples from the north of China. 45 CHB (red) from HAPMAP remain in the Chinese cohort (blue).

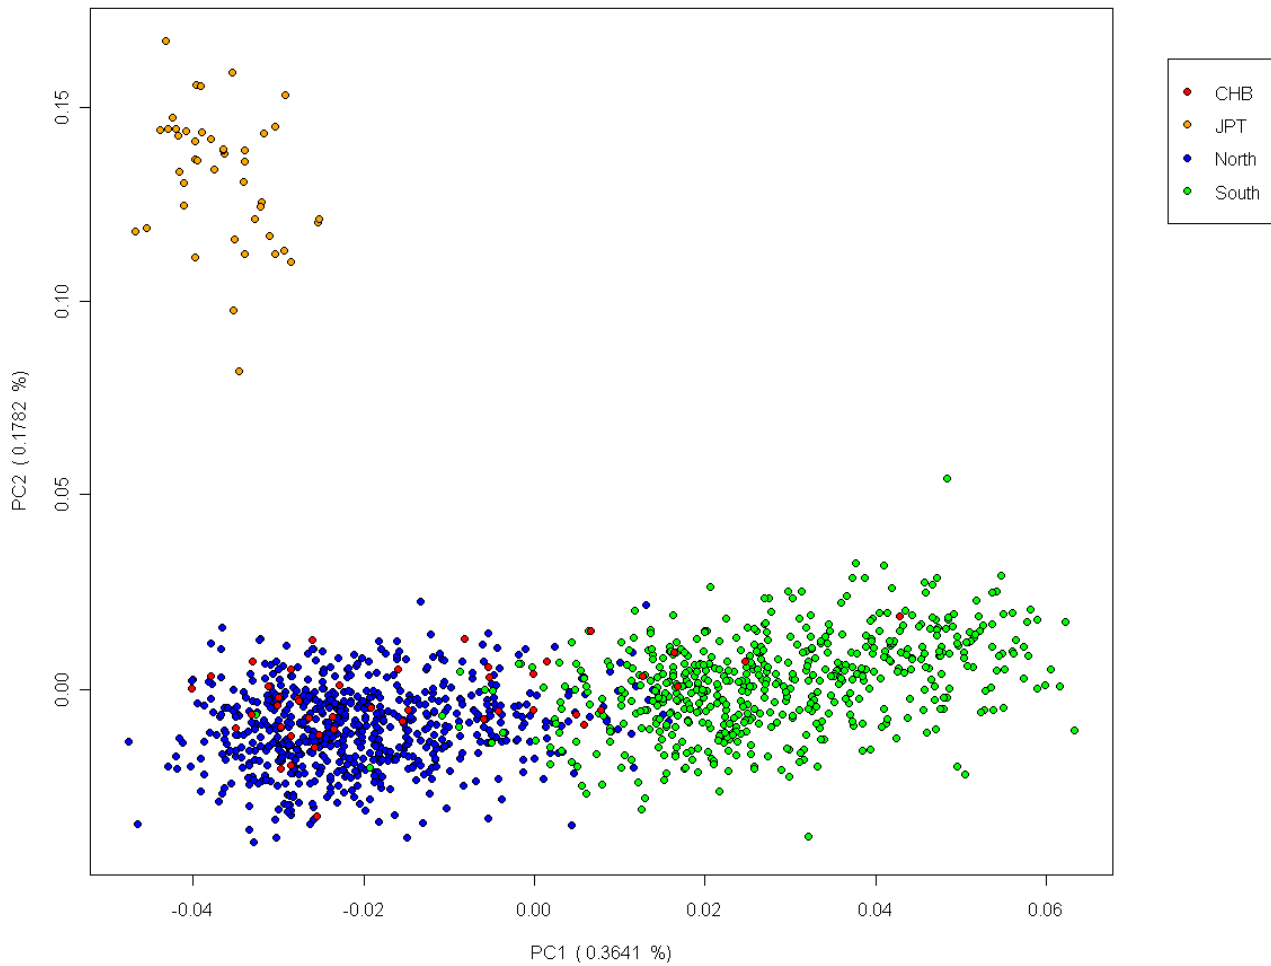

**Figure S3. A Pairwise Plot of PC1 to PC10 Derived from 107,565 SNPs in 1109 Samples, Excluding the Three Metropolises**

Beyond PC2, the PCs are not informative.

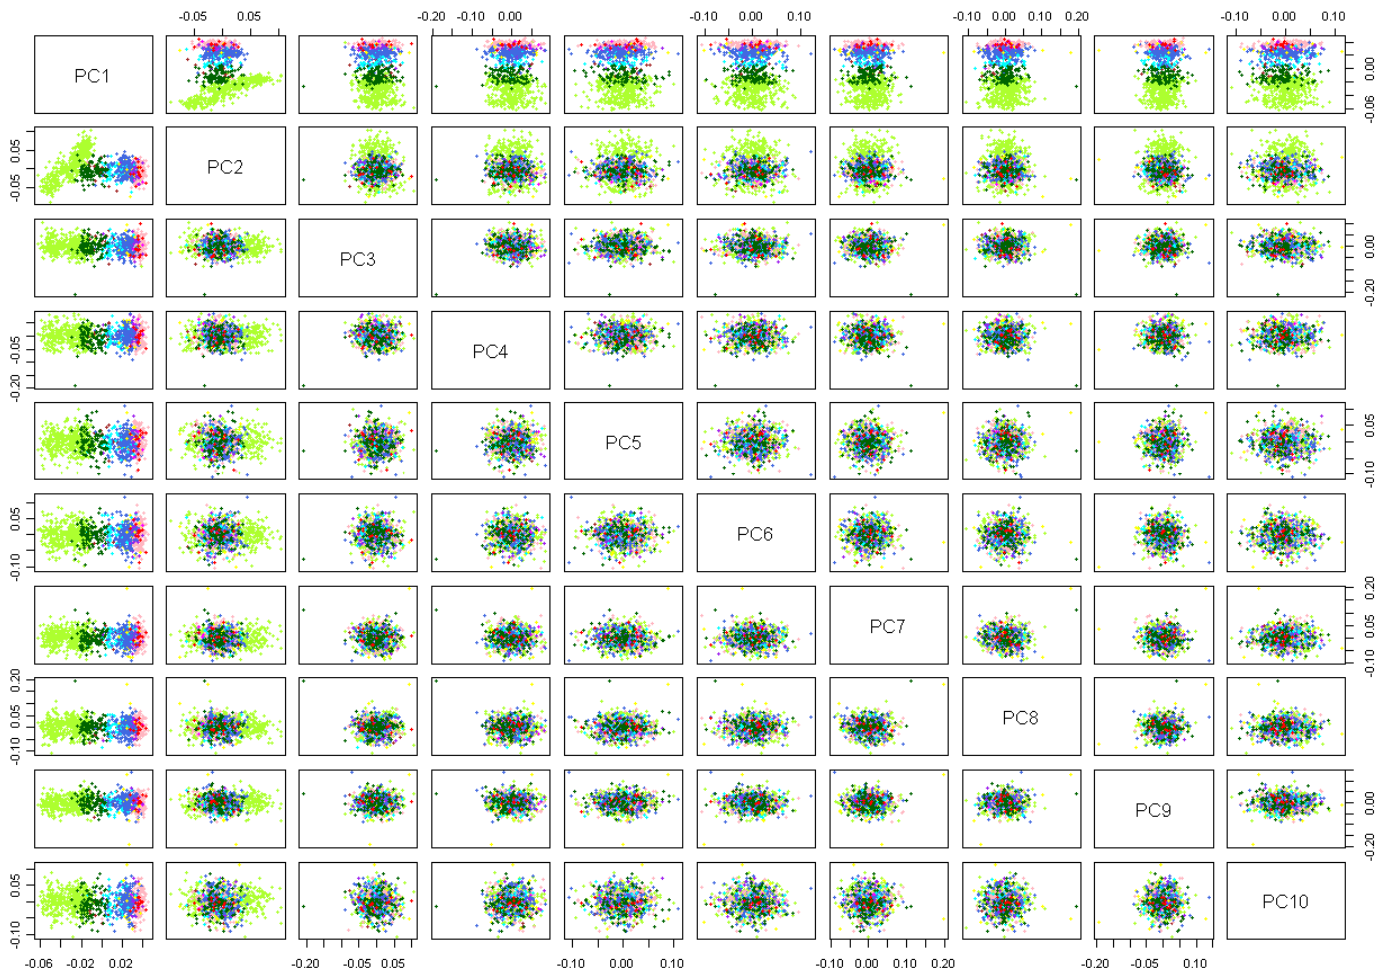

### Figure S4. PCA Analysis of the Samples from the Central Provinces

No discernible 'east-west' pattern was observed when PC1 is plotted against PC2.

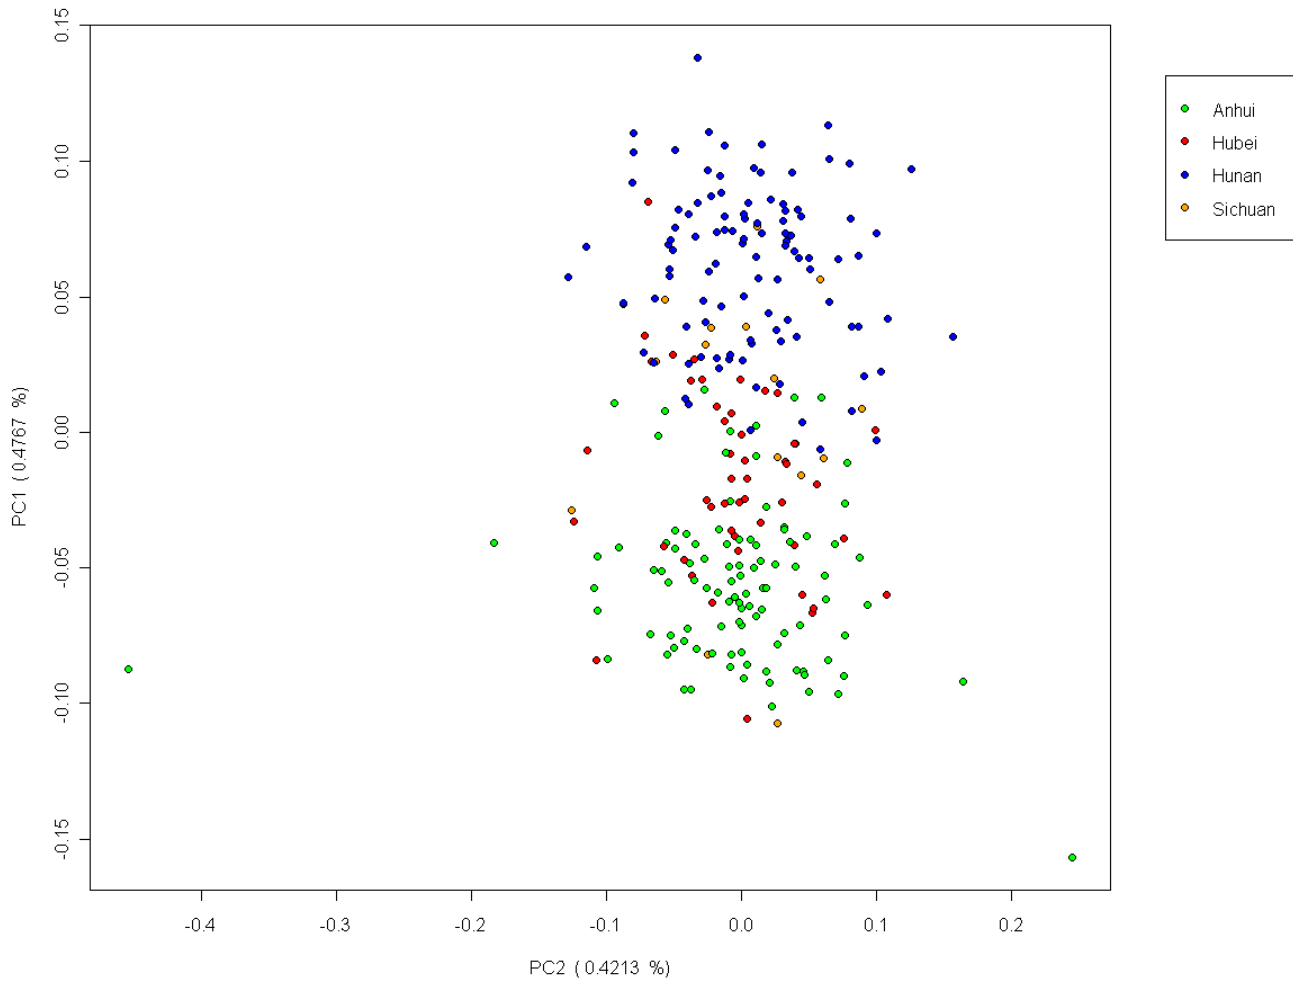

**Figure S5. Estimated Population Structure by FRAPPE for K=2 and K=3**

We can see that the population structures presented by both STRUCTURE and FRAPPE algorithms produce similar results. Similarly, each individual is represented by a thin vertical line and each province is demarcated by a thick vertical black line. The provinces are arranged from geographical north to south, with JPT on the extreme left, representing the northernmost locality, to Liaoning, the northernmost province, CHB, to Hubei (more central), then to Guangdong, the southernmost province, of which the individuals were rearranged based on its three main dialect groups of Teochew, Hakka and Cantonese. These were then followed by the individuals from the two metropolitan cities of Beijing (CHB) and Shanghai and the Singapore Chinese, of Southeast Asia.

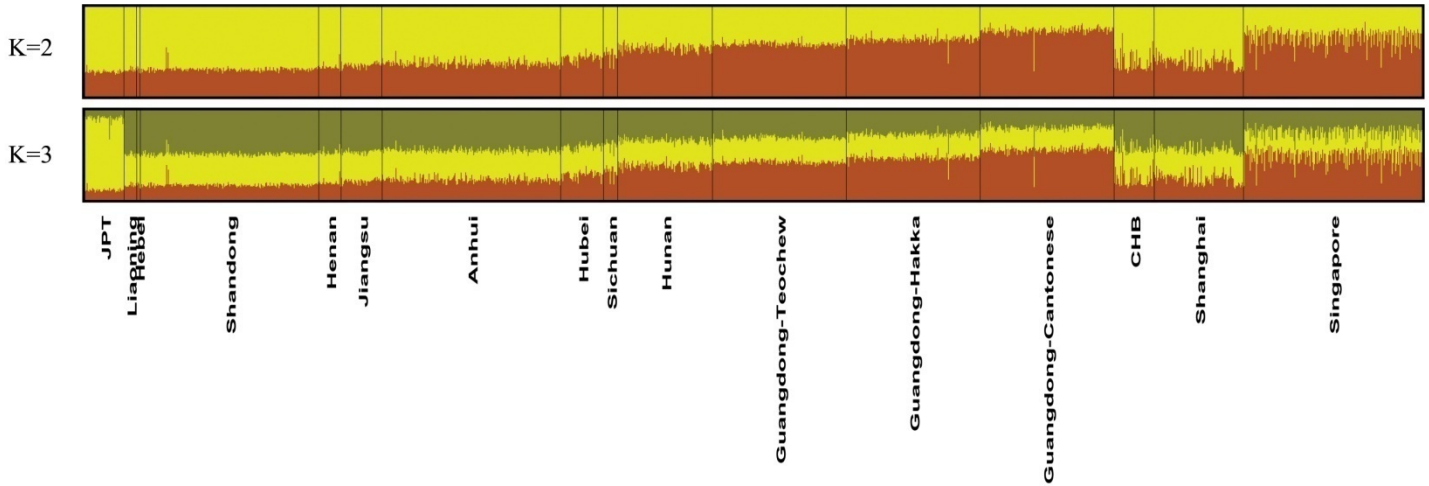

**Figure S6. Ordered (A) STRUCTURE and (B) FRAPPE output for K=2 and K=3**

All the samples were ordered by province, city or dialect group in terms of their ‘brown’ membership coefficient, to show the proportion of ancestry of the individuals of the three metropolitan cities.

**A**

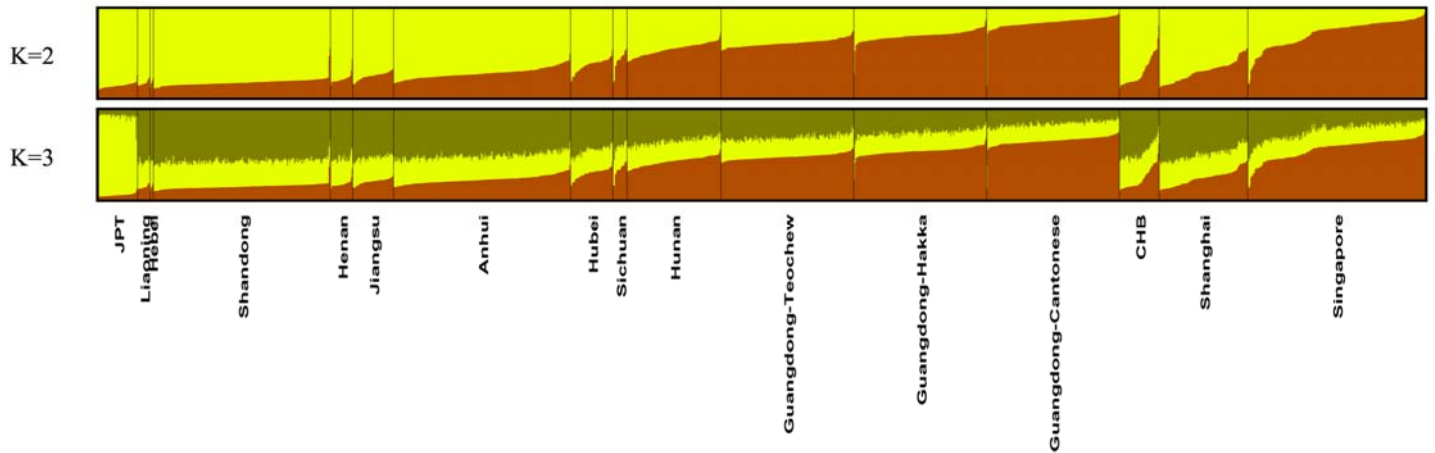

**B**

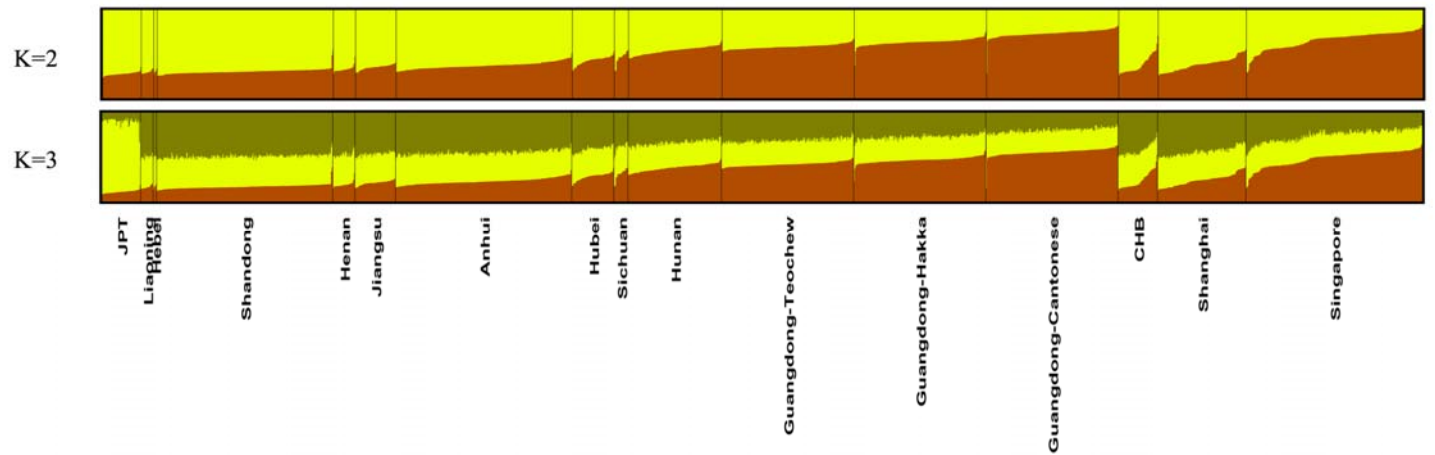



**Figure S7. The Graph Shows the Exponential Increase of the  $\lambda$ , with Increasing Proportion of the Chinese from the Southern Provinces**

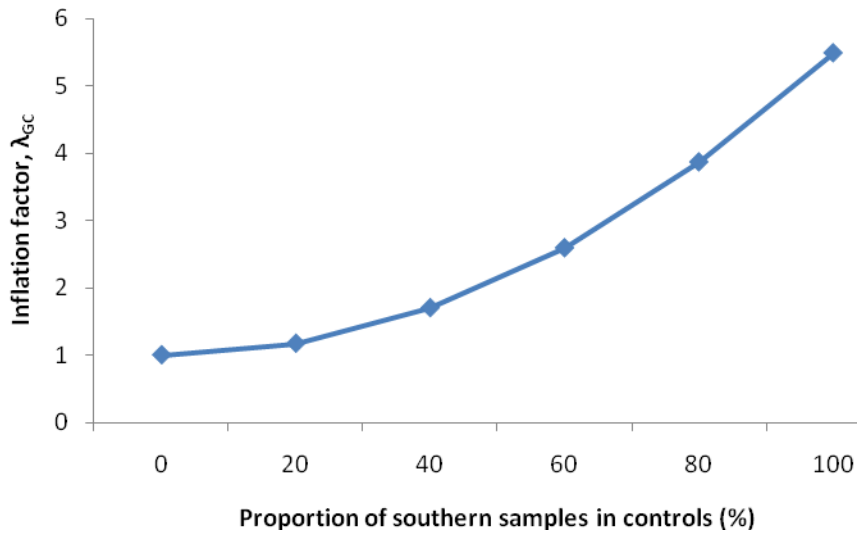

**Figure S8. 500N Cases and 500N Controls for the Simulation Study on the Effect of Population Stratification on Case-Control Studies**

This serves as a reference, since both sets of individuals are from the same region, so there is supposed to be minimal population stratification. In this case,  $\lambda=1$ .

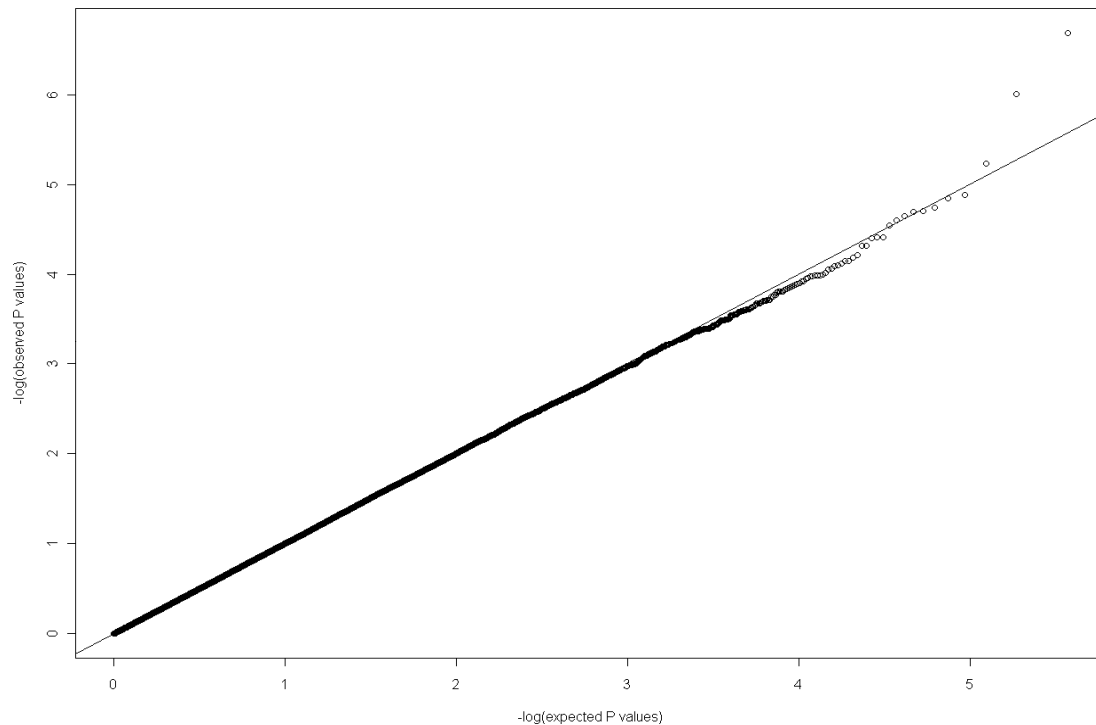

### Figure S9. Combination of GC- and PCA-Correction in 100 % Stratification between 500N and 500S

The stratification was rectified only when both GC and PCA corrections were utilized.

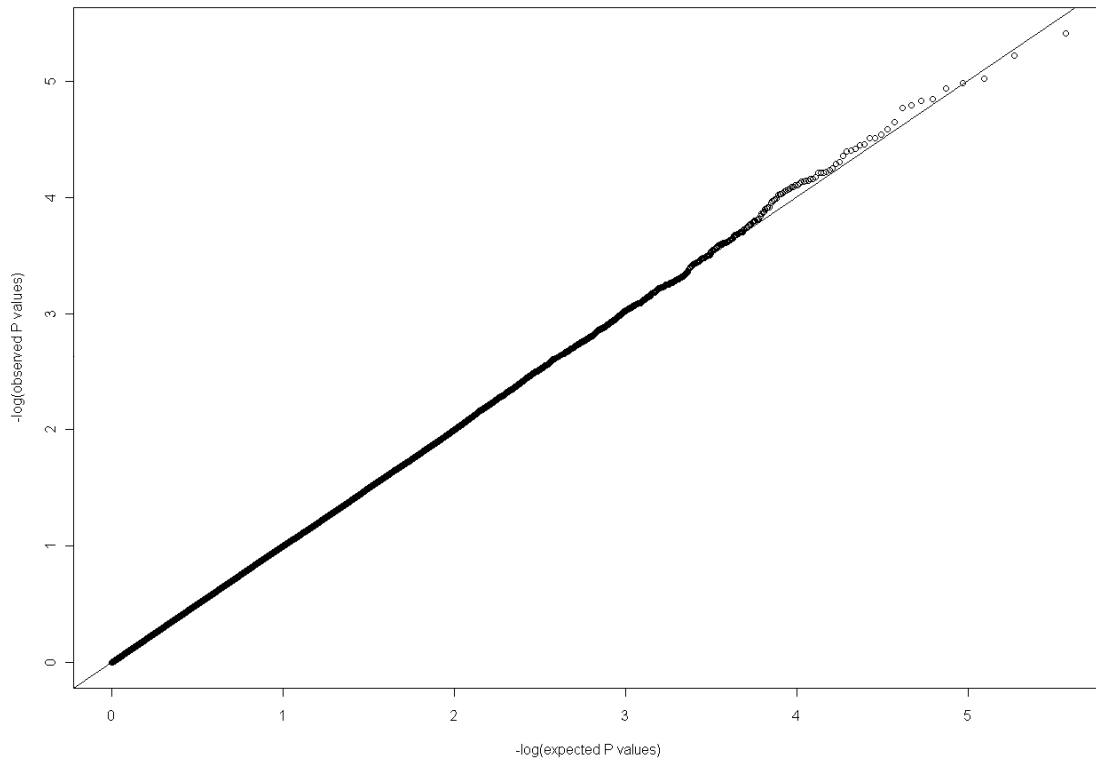

### Figure S10. QQ-Plot of the Association Analysis in 1000 Shanghai Samples, Where the Case and Control Samples are Selected based on PC1 Values

The Shanghai samples were first split equally into the 'north' and 'south' clusters based on the PC1 value, and the simulated association analysis was then performed on the 500 case from the 'north' cluster and the 500 control samples from the 'south' cluster of the Shanghai samples.

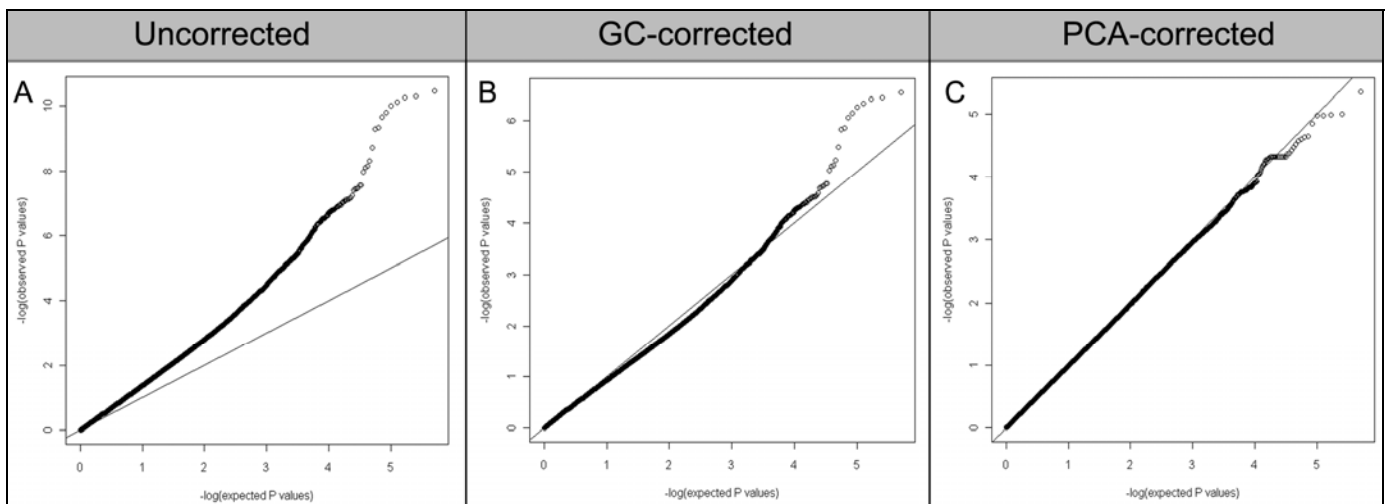

**Table S1. Summary of the Genome-wide Datasets Used in this Study**

All the samples were combined and the common SNPs from these disease GWAS studies were consolidated into a superset for the purpose of this study. Two datasets were derived from the combined dataset: the PS set for population structure analysis, and the SM set for simulation analysis. The SM set was derived from the GWAS datasets (excluding Psoriasis Singapore) and the Sichuan dataset (marked with \*).

|       | <b>Dataset</b>                                                | <b>Number of samples</b> | <b>Number of SNPs</b> |
|-------|---------------------------------------------------------------|--------------------------|-----------------------|
| GWAS* | Leprosy                                                       | 706                      | 491,877               |
| GWAS* | Psoriasis                                                     | 2253                     | 494,901               |
| GWAS* | Nasopharyngeal Carcinoma                                      | 1977                     | 469,288               |
| GWAS* | Vitiligo                                                      | 1041                     | 494,110               |
| GWAS* | Systemic Lupus Erythematosus                                  | 587                      | 494,522               |
| GWAS  | Psoriasis Singapore                                           | 570                      | 482,874               |
|       | * Sichuan                                                     | 16                       | 570,013               |
|       | Shanghai                                                      | 1005                     | 567,933               |
|       | CHB (Hapmap)                                                  | 45                       | 3,731,053             |
|       | <b>Set 1 (PS set)<br/>– for Population Structure Analysis</b> | <b>1454</b>              | <b>420,931</b>        |
|       | <b>Set 2 (SM set)<br/>– for Simulation Analysis</b>           | <b>6580 (marked *)</b>   | <b>400,328</b>        |

**Table S2. Summary of the Numbers of SNPs Removed during Various Filterings**

The initial set of common SNPs pooled from the samples were reduced further after removing SNPs from the regions of long-range LD, significant SNPs from the various GWAS and correlated SNPs. This gives the final number of SNPs used in the respective analyses.

|                                                                                                                                                           | <b>PS for population structure analysis</b> | <b>SM for GWAS simulation analysis</b> |
|-----------------------------------------------------------------------------------------------------------------------------------------------------------|---------------------------------------------|----------------------------------------|
| <b>Initial</b>                                                                                                                                            | 420,931                                     | 400,328                                |
| <b>Total number of SNPs significant in various GWAS</b>                                                                                                   | Not removed                                 | 22,300                                 |
| <b>Total number of SNPs from regions of long-range LD:<br/>Chr5: 44-51.5Mb<br/>Chr6: 25-37Mb<br/>Chr8: 1-12.7Mb<br/>Chr11: 45-57Mb<br/>Chr11: 84-86Mb</b> | 7,454                                       | 4,645                                  |
|                                                                                                                                                           | <b>413,477<br/>(for STRUCTURE/FRAPPE)</b>   | <b>373,383</b>                         |
| <b>Removal of correlated SNPs (<math>r^2 &gt; 0.2</math>)</b>                                                                                             | 305,912                                     | Not removed                            |
|                                                                                                                                                           | <b>107,565<br/>(for PCA)</b>                | <b>373,383</b>                         |

**Table S3. Average  $F_{ST}$  Values between Three Major Geographic Regions of China and the Three Dialect Groups in Guangdong**

|                     | Central  | South    | Guangdong-Cantonese | Guangdong-Hakka | Guangdong-Teochew |
|---------------------|----------|----------|---------------------|-----------------|-------------------|
| North               | 0.001016 | 0.002236 | 0.003952            | 0.002911        | 0.002569          |
| Central             |          | 0.001520 | 0.003044            | 0.002188        | 0.001953          |
| South               |          |          | 0.001559            | 0.001182        | 0.001381          |
| Guangdong-Cantonese |          |          |                     | 0.001919        | 0.002270          |
| Guangdong-Hakka     |          |          |                     |                 | 0.001835          |

**Table S4. The Median Latitude and the Mean PC1 Value of Each Province**

The Pearson's correlation between the mean PC1 (of the samples in that province used in population stratification analysis) and the median latitude is 0.93.

|           | Lowest latitude (°/degree) | Highest latitude (°/degree) | Median latitude (°/degree) | mean PC1 |
|-----------|----------------------------|-----------------------------|----------------------------|----------|
| Liaoning  | 38.72                      | 43.43                       | 41.08                      | 0.03558  |
| Hebei     | 36.05                      | 42.07                       | 39.06                      | 0.03400  |
| Shandong  | 34.38                      | 38.40                       | 36.39                      | 0.03544  |
| Henan     | 31.38                      | 36.40                       | 33.89                      | 0.03067  |
| Jiangsu   | 30.75                      | 35.33                       | 33.04                      | 0.02691  |
| Anhui     | 29.68                      | 34.63                       | 32.16                      | 0.02293  |
| Sichuan   | 26.05                      | 34.32                       | 30.18                      | 0.00513  |
| Hubei     | 29.42                      | 33.35                       | 31.38                      | 0.01135  |
| Hunan     | 24.65                      | 30.13                       | 27.39                      | -0.01036 |
| Guangdong | 20.22                      | 25.52                       | 22.87                      | -0.03075 |

**Table S5. Average Membership Coefficients across the Samples from Each Province, Their Correlation with Latitude and Also the Inter-cluster Correlation between FRAPPE and STRUCTURE Outputs from the Same K Value**

(A) Groups (Grp) 1, 2 and 3 were distinguished based on their similarity in membership coefficients. Taking STRUCTURE K=3, it can be observed that group 1 has the largest membership coefficients in the range of 0.50-0.58, group 2 range 0.34-0.45 and group 3 comprising only of Guangdong has 0.2339. Group 2 is very obviously an intermediate region with Sichuan and Hubei more similar to group 1 and Hunan more similar to Guangdong. CHB and Shanghai were excluded in this table because of the highly varied individual membership coefficients. The average membership coefficients of the entire Guangdong province are the averages of the coefficients of the three main dialect groups of Guangdong – Hakka, Cantonese and Teochew. The average absolute Pearson’s correlation between each membership coefficient and the median latitude is about 0.94. (B) Table S4B shows the Pearson’s correlation between the average membership coefficients of the clusters defined by FRAPPE and STRUCTURE when compared across the same K value. The nomenclature corresponds to the column in Table S4A and is read STRUCTURE (S) and FRAPPE (F), followed by the K value, a dot and then the cluster. So the second cluster of STRUCTURE with K=2, will be denoted “S2.2”.

**A**

| Grp | Province                  | Median Latitude (degree) | STRUCTURE     |                |               |              |              | FRAPPE       |              |              |              |              | Sample size |
|-----|---------------------------|--------------------------|---------------|----------------|---------------|--------------|--------------|--------------|--------------|--------------|--------------|--------------|-------------|
|     |                           |                          | K=2           |                | K=3           |              |              | K=2          |              | K=3          |              |              |             |
|     |                           |                          | S2.1          | S2.2           | S3.1          | S3.2         | S3.3         | F2.1         | F2.2         | F3.1         | F3.2         | F3.3         |             |
| 1   | Anhui                     | 32.16                    | 0.7257        | 0.2743         | 0.5084        | 0.2229       | 0.2686       | 0.63         | 0.37         | 0.4475       | 0.2276       | 0.3249       | 200         |
|     | Jiangsu                   | 33.04                    | 0.7573        | 0.2427         | 0.5297        | 0.1998       | 0.2705       | 0.6498       | 0.3502       | 0.4621       | 0.2099       | 0.328        | 46          |
|     | Henan                     | 33.89                    | 0.7872        | 0.2128         | 0.5392        | 0.1758       | 0.2851       | 0.6693       | 0.3307       | 0.4688       | 0.1912       | 0.34         | 25          |
|     | Shandong                  | 36.39                    | 0.8295        | 0.1705         | 0.5679        | 0.1445       | 0.2876       | 0.6972       | 0.3028       | 0.4886       | 0.1668       | 0.3446       | 200         |
|     | Hebei                     | 39.06                    | 0.8313        | 0.1687         | 0.5705        | 0.1436       | 0.2859       | 0.6986       | 0.3014       | 0.4903       | 0.1667       | 0.3431       | 4           |
|     | Liaoning                  | 41.08                    | 0.8371        | 0.1629         | 0.5741        | 0.1386       | 0.2873       | 0.7027       | 0.2973       | 0.4922       | 0.1623       | 0.3455       | 14          |
| 2   | Hubei                     | 31.38                    | 0.6331        | 0.3669         | 0.4507        | 0.2926       | 0.2567       | 0.5718       | 0.4282       | 0.4083       | 0.2812       | 0.3105       | 48          |
|     | Hunan                     | 27.39                    | 0.4528        | 0.5472         | 0.3438        | 0.4293       | 0.2269       | 0.4587       | 0.5413       | 0.335        | 0.3826       | 0.2824       | 106         |
|     | Sichuan                   | 30.18                    | 0.5798        | 0.4202         | 0.4154        | 0.333        | 0.2516       | 0.5383       | 0.4617       | 0.3833       | 0.3103       | 0.3064       | 16          |
| 3   | Guangdong                 | 22.87                    | 0.2787        | 0.7213         | 0.2339        | 0.562        | 0.2042       | 0.3478       | 0.6522       | 0.2574       | 0.4835       | 0.2592       | 450         |
|     | -Hakka                    | -                        | 0.3014        | 0.6986         | 0.2481        | 0.5438       | 0.2081       | 0.6365       | 0.3635       | 0.2692       | 0.4692       | 0.2616       | 150         |
|     | -Cantonese                | -                        | 0.1507        | 0.8493         | 0.1495        | 0.6605       | 0.1899       | 0.7357       | 0.2643       | 0.1945       | 0.5591       | 0.2464       | 150         |
|     | -Teochew                  | -                        | 0.384         | 0.616          | 0.3038        | 0.4814       | 0.2148       | 0.5844       | 0.4157       | 0.3086       | 0.4218       | 0.2695       | 150         |
|     | Correlation with latitude |                          | <b>0.9353</b> | <b>-0.9353</b> | <b>0.9348</b> | <b>-0.94</b> | <b>0.931</b> | <b>0.937</b> | <b>-0.94</b> | <b>0.934</b> | <b>0.939</b> | <b>-0.94</b> |             |

**B**

| Correlation | F2.1 | F2.2 | F3.1 | F3.2  | F3.3 |
|-------------|------|------|------|-------|------|
| S2.1        | 1    | -1   |      |       |      |
| S2.2        |      | 1    |      |       |      |
| S3.1        |      |      | 1    | 0.995 | -1   |
| S3.2        |      |      |      | 1     | -1   |
| S3.3        |      |      |      |       | 1    |

**Table S6. Membership Coefficient of each Individual from the CHB Matched to a Group in Table S4A**

There are 28 CHB from group 1, the more northerly individuals, 15 from group 2, the intermediate, and 2 from group 3, the more southerly individuals.

|    | CHB<br>Sample-id | STRUCTURE |        |        |        |        | FRAPPE |        |        |        |        | Grp |
|----|------------------|-----------|--------|--------|--------|--------|--------|--------|--------|--------|--------|-----|
|    |                  | K=2       |        | K=3    |        |        | K=2    |        | K=3    |        |        |     |
| 1  | CHB-NA18524      | 0.8024    | 0.1976 | 0.5311 | 0.1601 | 0.3088 | 0.6792 | 0.3208 | 0.4643 | 0.1861 | 0.3496 | 1   |
| 2  | CHB-NA18526      | 0.4737    | 0.5263 | 0.3475 | 0.4112 | 0.2413 | 0.4711 | 0.5289 | 0.3367 | 0.369  | 0.2943 | 2   |
| 3  | CHB-NA18529      | 0.8206    | 0.1794 | 0.5277 | 0.1466 | 0.3258 | 0.69   | 0.31   | 0.4637 | 0.1716 | 0.3647 | 1   |
| 4  | CHB-NA18532      | 0.6364    | 0.3636 | 0.4249 | 0.2854 | 0.2896 | 0.5743 | 0.4257 | 0.3931 | 0.278  | 0.3289 | 2   |
| 5  | CHB-NA18537      | 0.7088    | 0.2912 | 0.4738 | 0.2308 | 0.2954 | 0.6207 | 0.3793 | 0.4232 | 0.2371 | 0.3397 | 1   |
| 6  | CHB-NA18540      | 0.8133    | 0.1867 | 0.5608 | 0.1588 | 0.2804 | 0.6868 | 0.3132 | 0.4861 | 0.1772 | 0.3367 | 1   |
| 7  | CHB-NA18542      | 0.8541    | 0.1459 | 0.5458 | 0.1227 | 0.3315 | 0.7131 | 0.2869 | 0.4743 | 0.1509 | 0.3748 | 1   |
| 8  | CHB-NA18545      | 0.4547    | 0.5453 | 0.2912 | 0.4182 | 0.2906 | 0.4601 | 0.5399 | 0.2909 | 0.3793 | 0.3298 | 2   |
| 9  | CHB-NA18547      | 0.8419    | 0.1581 | 0.5369 | 0.1312 | 0.3319 | 0.7058 | 0.2942 | 0.4693 | 0.16   | 0.3707 | 1   |
| 10 | CHB-NA18550      | 0.1877    | 0.8123 | 0.1689 | 0.6275 | 0.2036 | 0.2915 | 0.7085 | 0.211  | 0.5346 | 0.2544 | 3   |
| 11 | CHB-NA18552      | 0.6103    | 0.3897 | 0.4302 | 0.3075 | 0.2624 | 0.5579 | 0.4421 | 0.393  | 0.2959 | 0.3111 | 2   |
| 12 | CHB-NA18555      | 0.5447    | 0.4553 | 0.3651 | 0.3534 | 0.2814 | 0.5168 | 0.4832 | 0.3496 | 0.3304 | 0.3199 | 2   |
| 13 | CHB-NA18558      | 0.8219    | 0.1781 | 0.5103 | 0.1426 | 0.3471 | 0.6923 | 0.3077 | 0.4477 | 0.1689 | 0.3834 | 1   |
| 14 | CHB-NA18561      | 0.835     | 0.165  | 0.5879 | 0.1425 | 0.2696 | 0.7006 | 0.2994 | 0.5039 | 0.1622 | 0.3338 | 1   |
| 15 | CHB-NA18562      | 0.8094    | 0.1906 | 0.534  | 0.1554 | 0.3106 | 0.6847 | 0.3153 | 0.4613 | 0.179  | 0.3597 | 1   |
| 16 | CHB-NA18563      | 0.8895    | 0.1105 | 0.5708 | 0.0939 | 0.3353 | 0.7419 | 0.2581 | 0.4964 | 0.1273 | 0.3764 | 1   |
| 17 | CHB-NA18564      | 0.8582    | 0.1418 | 0.552  | 0.1189 | 0.3292 | 0.7148 | 0.2852 | 0.4791 | 0.1498 | 0.3711 | 1   |
| 18 | CHB-NA18566      | 0.7907    | 0.2093 | 0.5434 | 0.1754 | 0.2812 | 0.6714 | 0.3286 | 0.4723 | 0.189  | 0.3387 | 1   |
| 19 | CHB-NA18570      | 0.5264    | 0.4736 | 0.3679 | 0.374  | 0.2581 | 0.5035 | 0.4965 | 0.3499 | 0.3413 | 0.3088 | 2   |
| 20 | CHB-NA18571      | 0.4752    | 0.5248 | 0.3158 | 0.4071 | 0.2771 | 0.4728 | 0.5272 | 0.3151 | 0.3661 | 0.3188 | 2   |
| 21 | CHB-NA18572      | 0.8487    | 0.1513 | 0.561  | 0.129  | 0.31   | 0.7088 | 0.2912 | 0.4791 | 0.1594 | 0.3615 | 1   |
| 22 | CHB-NA18573      | 0.5168    | 0.4832 | 0.3646 | 0.3773 | 0.2581 | 0.4987 | 0.5013 | 0.3493 | 0.3507 | 0.3001 | 2   |
| 23 | CHB-NA18576      | 0.8187    | 0.1813 | 0.539  | 0.149  | 0.312  | 0.6903 | 0.3097 | 0.4687 | 0.1713 | 0.36   | 1   |
| 24 | CHB-NA18577      | 0.6887    | 0.3113 | 0.4612 | 0.2478 | 0.291  | 0.6062 | 0.3938 | 0.4204 | 0.2459 | 0.3337 | 2   |
| 25 | CHB-NA18579      | 0.8307    | 0.1693 | 0.5152 | 0.1368 | 0.348  | 0.6973 | 0.3027 | 0.4487 | 0.1654 | 0.3859 | 1   |
| 26 | CHB-NA18582      | 0.4821    | 0.5179 | 0.3321 | 0.4045 | 0.2635 | 0.4763 | 0.5237 | 0.3237 | 0.3659 | 0.3104 | 2   |

|    |             |        |        |        |        |        |        |        |        |        |        |   |
|----|-------------|--------|--------|--------|--------|--------|--------|--------|--------|--------|--------|---|
| 27 | CHB-NA18592 | 0.7856 | 0.2144 | 0.53   | 0.177  | 0.293  | 0.6662 | 0.3338 | 0.4616 | 0.1919 | 0.3465 | 1 |
| 28 | CHB-NA18593 | 0.7527 | 0.2473 | 0.5005 | 0.1993 | 0.3003 | 0.6482 | 0.3518 | 0.4393 | 0.2155 | 0.3452 | 1 |
| 29 | CHB-NA18594 | 0.6333 | 0.3667 | 0.4429 | 0.2906 | 0.2665 | 0.572  | 0.428  | 0.4012 | 0.2808 | 0.318  | 2 |
| 30 | CHB-NA18603 | 0.6218 | 0.3782 | 0.439  | 0.2998 | 0.2612 | 0.5648 | 0.4352 | 0.401  | 0.2917 | 0.3073 | 2 |
| 31 | CHB-NA18605 | 0.8145 | 0.1855 | 0.5332 | 0.1501 | 0.3167 | 0.6879 | 0.3121 | 0.4614 | 0.1738 | 0.3649 | 1 |
| 32 | CHB-NA18608 | 0.8207 | 0.1793 | 0.5344 | 0.1485 | 0.3171 | 0.6921 | 0.3079 | 0.4662 | 0.1682 | 0.3656 | 1 |
| 33 | CHB-NA18609 | 0.8317 | 0.1683 | 0.5524 | 0.1418 | 0.3058 | 0.6988 | 0.3012 | 0.4786 | 0.1638 | 0.3576 | 1 |
| 34 | CHB-NA18611 | 0.8287 | 0.1713 | 0.5165 | 0.1372 | 0.3463 | 0.6966 | 0.3034 | 0.451  | 0.1636 | 0.3854 | 1 |
| 35 | CHB-NA18612 | 0.826  | 0.174  | 0.5019 | 0.1412 | 0.3569 | 0.6955 | 0.3045 | 0.4456 | 0.1675 | 0.3868 | 1 |
| 36 | CHB-NA18620 | 0.8234 | 0.1766 | 0.5483 | 0.1506 | 0.3011 | 0.6922 | 0.3078 | 0.4758 | 0.1718 | 0.3524 | 1 |
| 37 | CHB-NA18621 | 0.8586 | 0.1414 | 0.5515 | 0.1152 | 0.3333 | 0.719  | 0.281  | 0.4748 | 0.145  | 0.3802 | 1 |
| 38 | CHB-NA18622 | 0.6592 | 0.3408 | 0.4584 | 0.2709 | 0.2707 | 0.5882 | 0.4118 | 0.4131 | 0.27   | 0.3169 | 2 |
| 39 | CHB-NA18623 | 0.8085 | 0.1915 | 0.4935 | 0.1526 | 0.3539 | 0.6836 | 0.3164 | 0.4383 | 0.1771 | 0.3846 | 1 |
| 40 | CHB-NA18624 | 0.7757 | 0.2243 | 0.5434 | 0.1868 | 0.2697 | 0.6606 | 0.3394 | 0.4719 | 0.2028 | 0.3253 | 1 |
| 41 | CHB-NA18632 | 0.4527 | 0.5473 | 0.3111 | 0.4268 | 0.2622 | 0.4582 | 0.5418 | 0.309  | 0.384  | 0.307  | 2 |
| 42 | CHB-NA18633 | 0.7147 | 0.2853 | 0.4713 | 0.2278 | 0.3009 | 0.6224 | 0.3776 | 0.4183 | 0.234  | 0.3477 | 1 |
| 43 | CHB-NA18635 | 0.8505 | 0.1495 | 0.5264 | 0.1219 | 0.3517 | 0.7112 | 0.2888 | 0.4604 | 0.1516 | 0.388  | 1 |
| 44 | CHB-NA18636 | 0.329  | 0.671  | 0.2473 | 0.5198 | 0.2329 | 0.3817 | 0.6183 | 0.27   | 0.4536 | 0.2765 | 3 |
| 45 | CHB-NA18637 | 0.5753 | 0.4247 | 0.4058 | 0.3354 | 0.2588 | 0.535  | 0.465  | 0.3803 | 0.3124 | 0.3073 | 2 |
